# Supplementary material for: Enhanced macrophage tropism of HIV in brain and lymphoid tissues is associated with sensitivity to the broadly neutralizing CD4 binding site antibody b12
Source: PubMed Central journal article supplement (PMC2717910; doi:10.1186/1742-4690-6-69), 2009-07-20

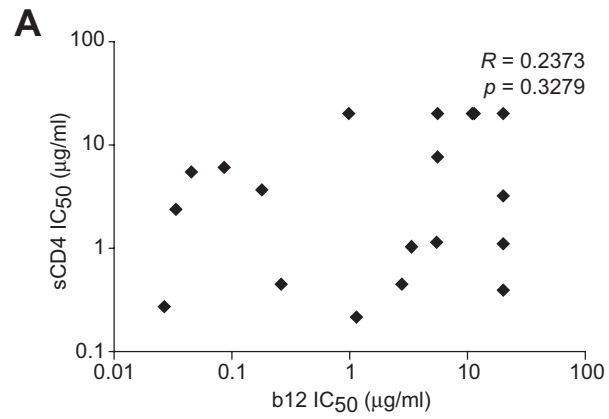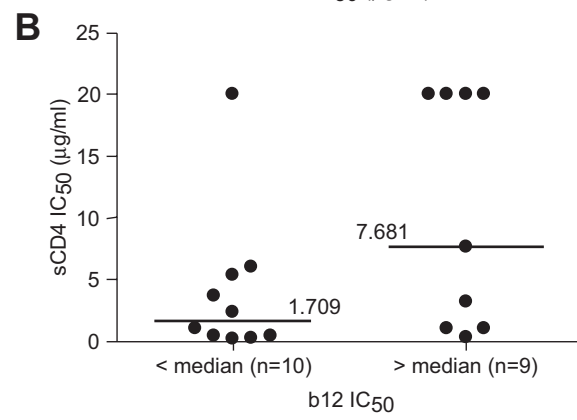

Supplement: 1742-4690-6-69-S1.pdf [file 1742-4690-6-69-S1.pdf]
